# Supplementary material
Source: HighWire-hosted journal article supplement (https://rmdopen.bmj.com/content/4/2/e000712)
Supplement: inline-supplementary-material-1 [file inline-supplementary-material-1.docx]

**Appendix 1.** Association of gout with atrial fibrillation, in pre-defined subgroup analyses, varying by race, gender, presence/absence of coronary artery disease, myocardial infarction, or congenital heart disease

|  | Multivariable-adjusted (model 1) | | Multivariable-adjusted  (Model 1) | | Multivariable-adjusted  (Model 1) | |
| --- | --- | --- | --- | --- | --- | --- |
|  | HR (95% CI) | P-value | HR (95% CI) | P-value | HR (95% CI) | P-value |
|  | **Black** |  | **White** |  | **Other race** |  |
| Gout | **2.01 (1.88, 2.16)** | **<.0001** | **1.91 (1.87, 1.95)** | **<.0001** | **1.85 (1.66, 2.06)** | **<.0001** |
|  |  |  |  |  |  |  |
|  | **Female** |  | **Male** |  |  |  |
| Gout | **1.92 (1.85, 1.98)** | **<.0001** | **1.91 (1.86, 1.96)** | **<.0001** |  |  |
|  |  |  |  |  |  |  |
|  | **No CAD** |  | **CAD** |  |  |  |
| Gout | **2.03 (1.98, 2.08)** | **<.0001** | **1.57 (1.51, 1.62)** | **<.0001** |  |  |
|  |  |  |  |  |  |  |
|  | **No Congenital heart dis** |  | **Congenital heart dis** |  |  |  |
| Gout | **1.91 (1.87, 1.95)** | **<.0001** | **1.89 (1.57, 2.28)** | **<.0001** |  |  |
|  |  |  |  |  |  |  |
|  | **No MI** |  | **MI** |  |  |  |
| Gout | **1.94 (1.89, 1.98)** | **<.0001** | **1.62 (1.50, 1.74)** | **<.0001** |  |  |
|  |  |  |  |  |  |  |
| **Gout*race p-value 0.13;**  **Gender*gout p-value 0.45;**  **CAD*gout p-value <.0001;**  **Congenital heart disease*gout p-value <.0001;**  **MI*gout p-value <.0001**  HR, Hazard ratio; CI, confidence interval; CAD, coronary artery disease; MI, myocardial infarction | | | | | | |
